# Supplementary material
Source: PubMed Central journal article supplement (PMC8057721)
Supplement: mmc1.pdf [file mmc1.pdf]

# THE LANCET

## Microbe

### Supplementary appendix

This appendix formed part of the original submission. We post it as supplied by the authors.

Supplement to: Olliaro P, Torreale E, Vaillant M. COVID-19 vaccine efficacy and effectiveness—the elephant (not) in the room. *Lancet Microbe* 2021; published online April 20. [https://doi.org/10.1016/S2666-5247\(21\)00069-0](https://doi.org/10.1016/S2666-5247(21)00069-0).

## Appendix

**Table 1.** Relative risk, relative risk reduction, absolute risk reduction and numbers needed to treat with 95% confidence intervals from publicly-available information.

**Table 2.** Calculations

Supplementary table 1.

| Company            | vaccine arms    |     |       | Relative risk |        |        |        |        | Vaccine efficacy: relative risk reduction |          |        |        | Absolute risk reduction |         |        |        | Numbers needed to vaccinate |         |       |       |
|--------------------|-----------------|-----|-------|---------------|--------|--------|--------|--------|-------------------------------------------|----------|--------|--------|-------------------------|---------|--------|--------|-----------------------------|---------|-------|-------|
|                    |                 | n   | N     | Risk          | RR     | SE(RR) | 95%LL  | 95%UL  | (RRR)                                     | SE (RRR) | 95%LL  | 95%UL  | ARR                     | SE(ARR) | 95%LL  | 95%UL  | NNV                         | SE(NNV) | 95%LL | 95%UL |
| Pfizer/BioNTech    | BNT162b2 mRNA   | 8   | 18198 | 0.4396        | 0.0497 | 0.7096 | 0.0245 | 0.1011 | 95.03%                                    | 0.14%    | 89.89% | 97.55% | 0.0084                  | 0.0014  | 0.0070 | 0.0098 | 119                         | 0.0007  | 102   | 143   |
|                    | Placebo         | 162 | 18325 | 8.8404        |        |        |        |        |                                           |          |        |        |                         |         |        |        |                             |         |       |       |
| Moderna/NIH        | mRNA-1273       | 11  | 14134 | 0.7783        | 0.0592 | 0.6078 | 0.0322 | 0.1087 | 94.08%                                    | 0.19%    | 89.13% | 96.78% | 0.0124                  | 0.0019  | 0.0104 | 0.0143 | 81                          | 0.0010  | 70    | 96    |
|                    | Placebo         | 185 | 14073 | 13.1457       |        |        |        |        |                                           |          |        |        |                         |         |        |        |                             |         |       |       |
| Gamaleya           | GamCovidVac     | 13  | 14094 | 0.9224        | 0.0903 | 0.6133 | 0.0489 | 0.1667 | 90.97%                                    | 0.29%    | 83.33% | 95.11% | 0.0093                  | 0.0029  | 0.0063 | 0.0122 | 108                         | 0.0015  | 82    | 158   |
|                    | Placebo         | 47  | 4601  | 10.2152       |        |        |        |        |                                           |          |        |        |                         |         |        |        |                             |         |       |       |
| Johnson & Johnson  | Ad26.COV2.S     | 116 | 19514 | 5.9445        | 0.3338 | 0.2092 | 0.2708 | 0.4115 | 66.62%                                    | 0.21%    | 58.85% | 72.92% | 0.0119                  | 0.0021  | 0.0097 | 0.0140 | 84                          | 0.0011  | 71    | 103   |
|                    | Placebo         | 348 | 19544 | 17.8060       |        |        |        |        |                                           |          |        |        |                         |         |        |        |                             |         |       |       |
| AstraZeneca/Oxford | ChAdOx1 nCov-19 | 37  | 5807  | 6.3716        | 0.3316 | 0.3699 | 0.2291 | 0.4800 | 66.84%                                    | 0.41%    | 52.00% | 77.09% | 0.0128                  | 0.0041  | 0.0088 | 0.0169 | 78                          | 0.0021  | 59    | 114   |
|                    | Placebo         | 112 | 5829  | 19.2143       |        |        |        |        |                                           |          |        |        |                         |         |        |        |                             |         |       |       |

Data source:

| Company            | vaccine         | source   | ref. |
|--------------------|-----------------|----------|------|
| Pfizer/BioNTech    | BNT162b2 mRNA   | table 2  | 2    |
| Moderna/NIH        | mRNA-1273       | figure 4 | 3    |
| Gamaleya           | GamCovidVac     | table 2  | 5    |
| Johnson & Johnson  | Ad26.COV2.S     | table 10 | 8    |
| AstraZeneca/Oxford | ChAdOx1 nCov-19 | table 2  | 4    |

**Supplementary Table 2.**

|             | diseased | healthy | All |
|-------------|----------|---------|-----|
| Exposed     | a        | b       | n1  |
| Not exposed | c        | d       | n2  |
| All         |          |         |     |

Relative risk :  $RR = \frac{a/n_1}{c/n_2}$

Confidence intervals of RR :  $95\%CI = e^{Ln(RR) \pm 1.96 * SE}$  where  $SE = \sqrt{\frac{b/a}{n_1} + \frac{d/c}{n_2}}$

Relative Risk Reduction:  $RRR = 1 - RR$

Confidence intervals of RRR :  $95\%CI = 1 - 95\%CI RR$

Absolute Risk Reduction:  $aRR = \frac{c}{n_2} - \frac{a}{n_1}$

Confidence Intervals of aRR:  $95\%CI = aRR \pm 1.96 * SE$  where  $SE = \sqrt{\frac{a/n_1 \times (1 - a/n_1)}{n_1} + \frac{c/n_2 \times (1 - c/n_2)}{n_2}}$

Number Needed to Vaccinate:  $NNV = \frac{1}{aRR}$

Confidence Intervals of NNV:  $95\%CI = \frac{1}{95\%CI aRR}$
